# Supplementary material for: Genome-wide association study identifies multiple susceptibility loci for glioma
Source: PubMed Central journal article supplement (PMC4600760; doi:10.1038/ncomms9559), 2015-10-01
Supplement: ncomms9559-s1.pdf [file ncomms9559-s1.pdf]

## Supplementary Figures

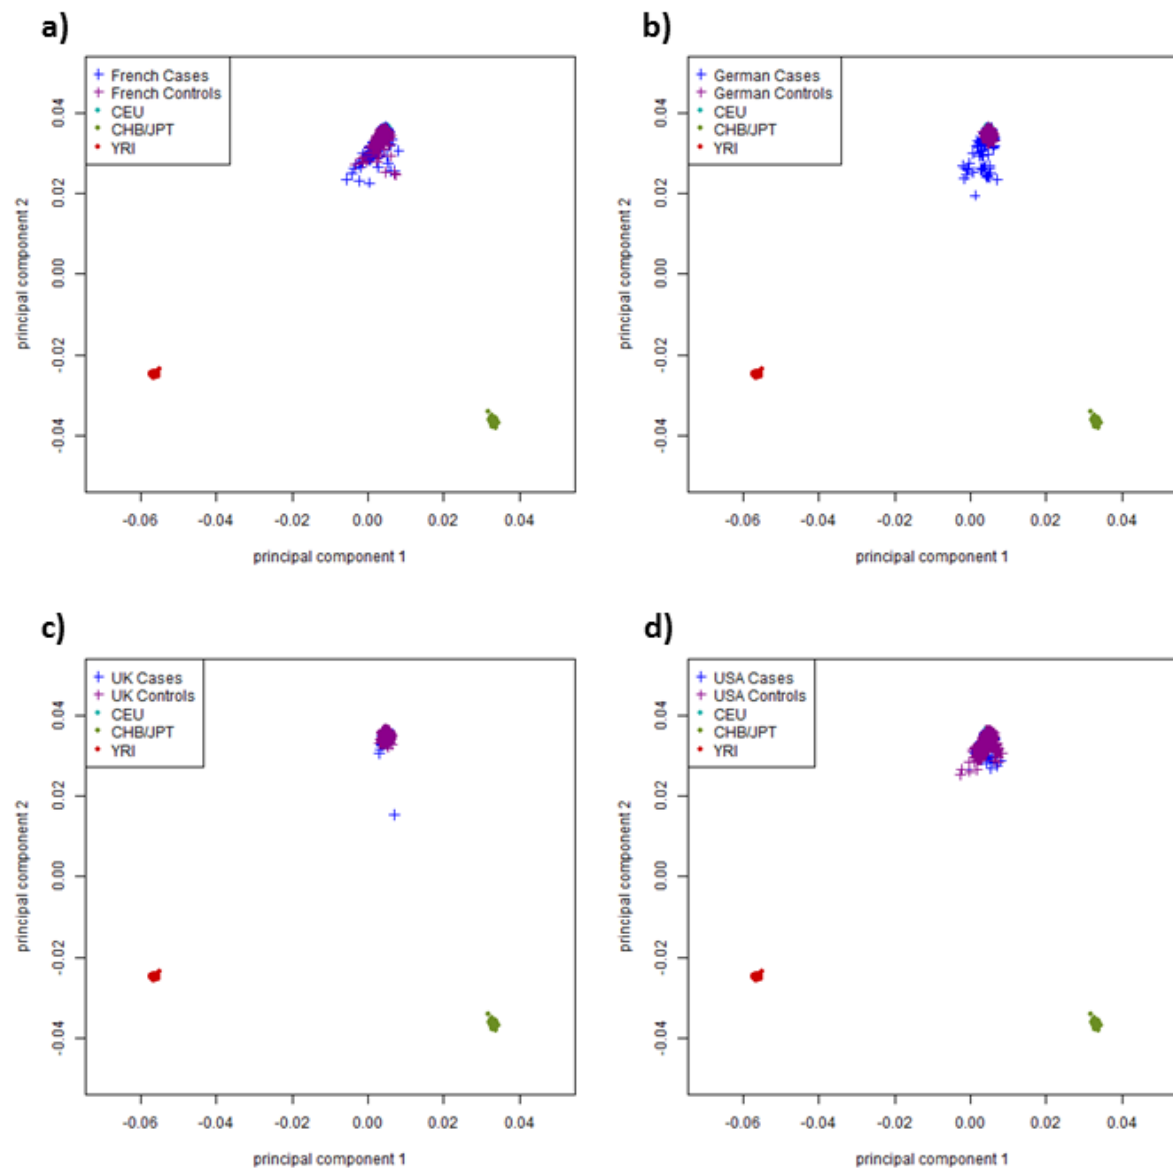

**Supplementary Figure 1: PCA plots of HapMap populations with the four GWAS datasets: a) French-GWAS; b) German-GWAS; c) UK-GWAS; d) USA-GWAS. Cases and controls are plotted as purple and blue crosses respectively. Red, green and teal circles respectively represent HapMap YRI, CHB/JPT and CEU populations.**

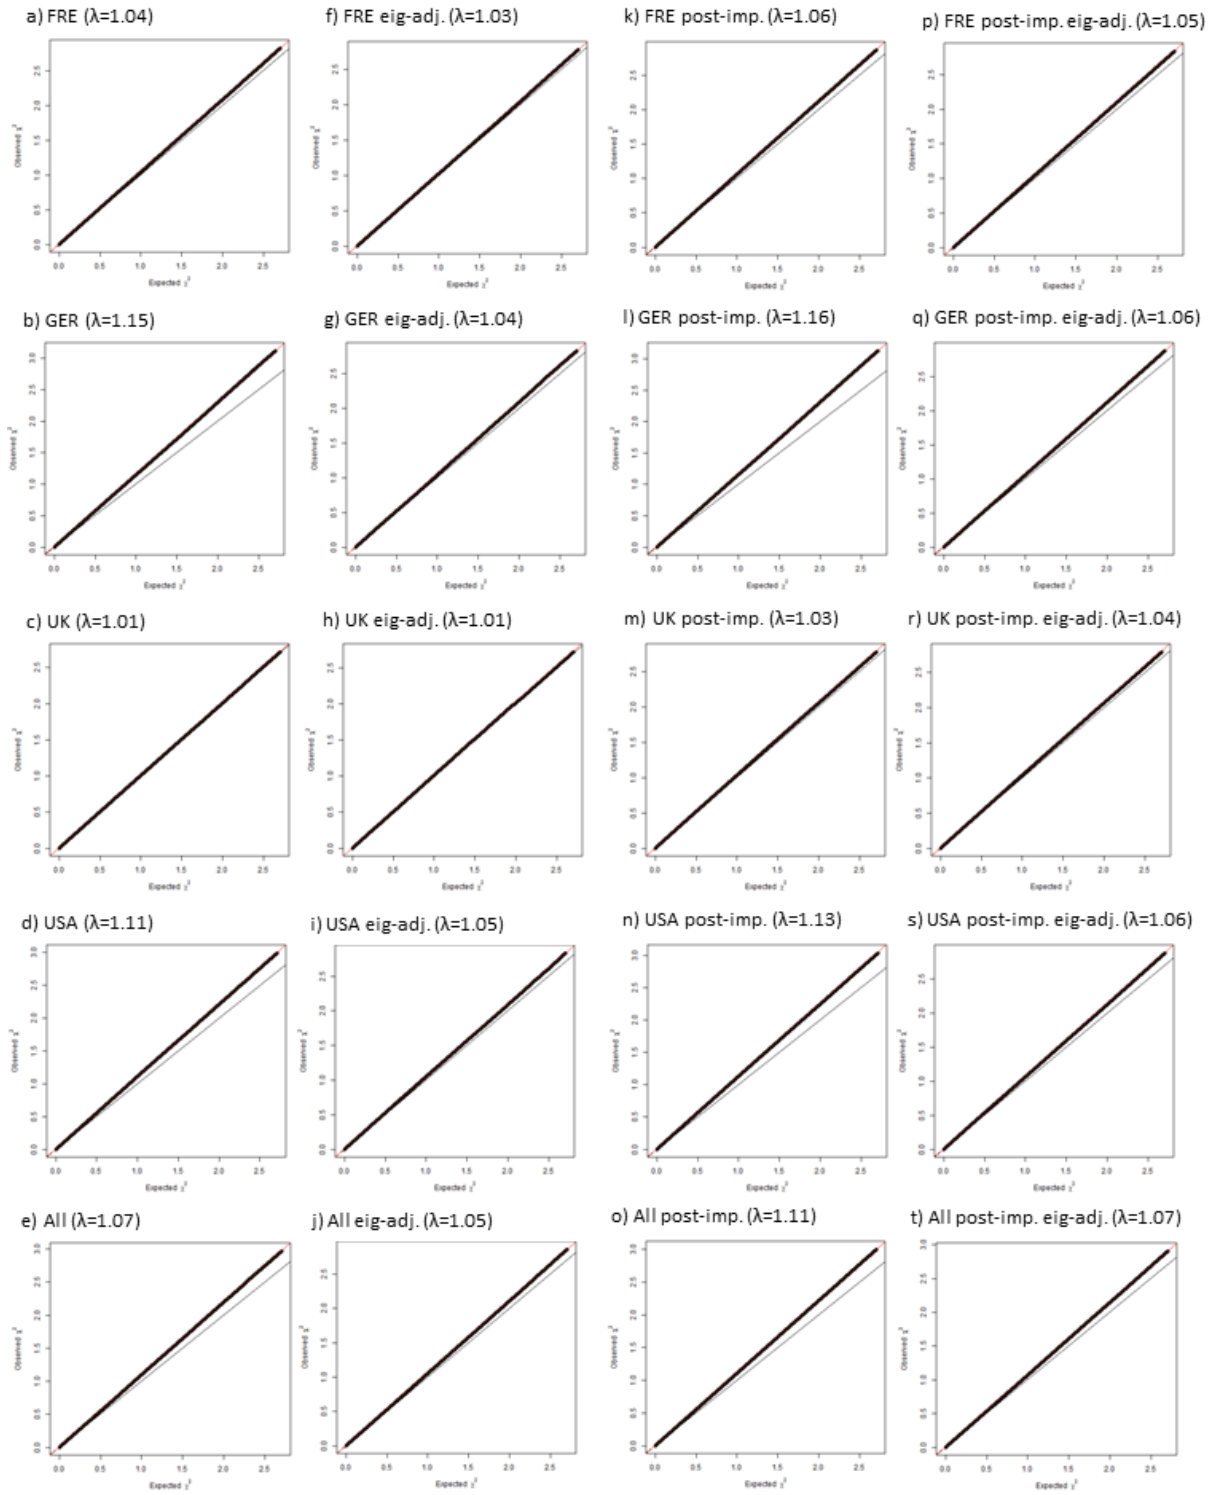

**Supplementary Figure 2: Q-Q plots of association statistics for the four Glioma GWAS datasets: (a-e), pre-imputation; (f-j), pre-imputation eigenstrat-adjusted; (k-o), post-imputation; (p-t), post-imputation eigenstrat adjusted. FRE, French-GWAS; GER, German-GWAS; UK, UK-GWAS; USA, USA-GWAS; All, combined meta-analysis.**

a) 3q26.2 , rs1920116 (all glioma)

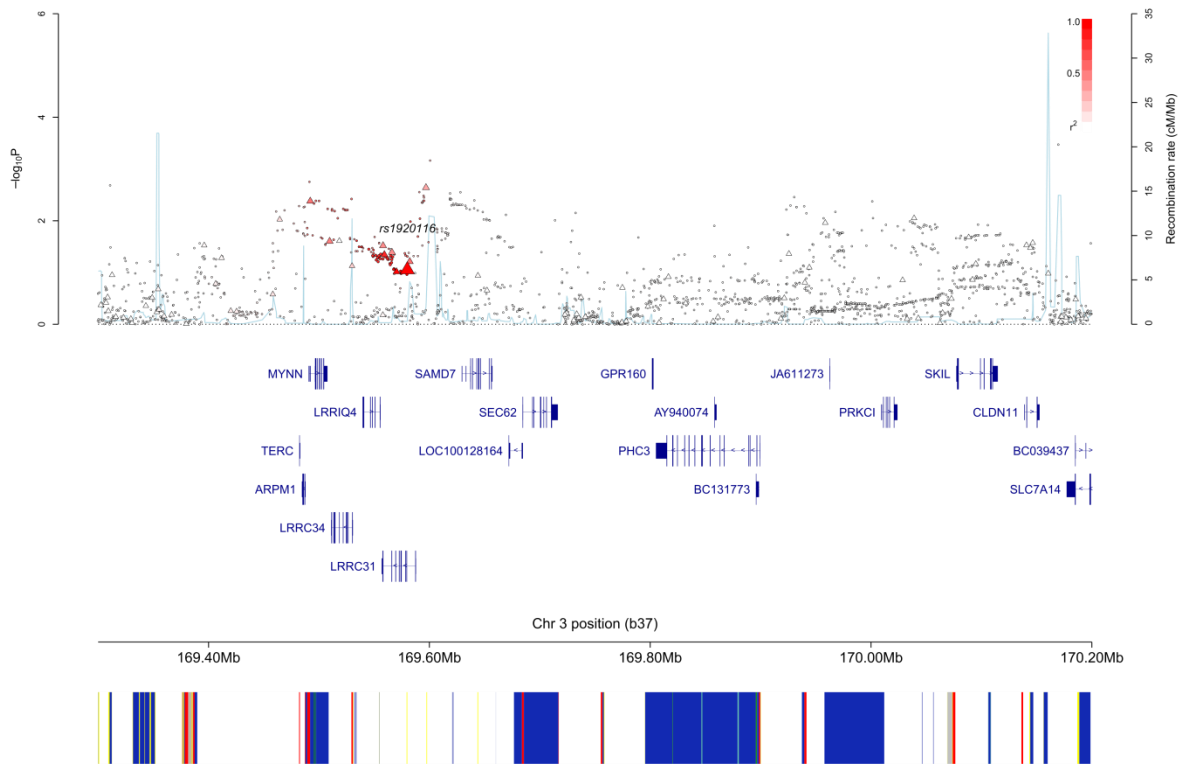

b) 3q26.2 , rs1920116 (GBM)

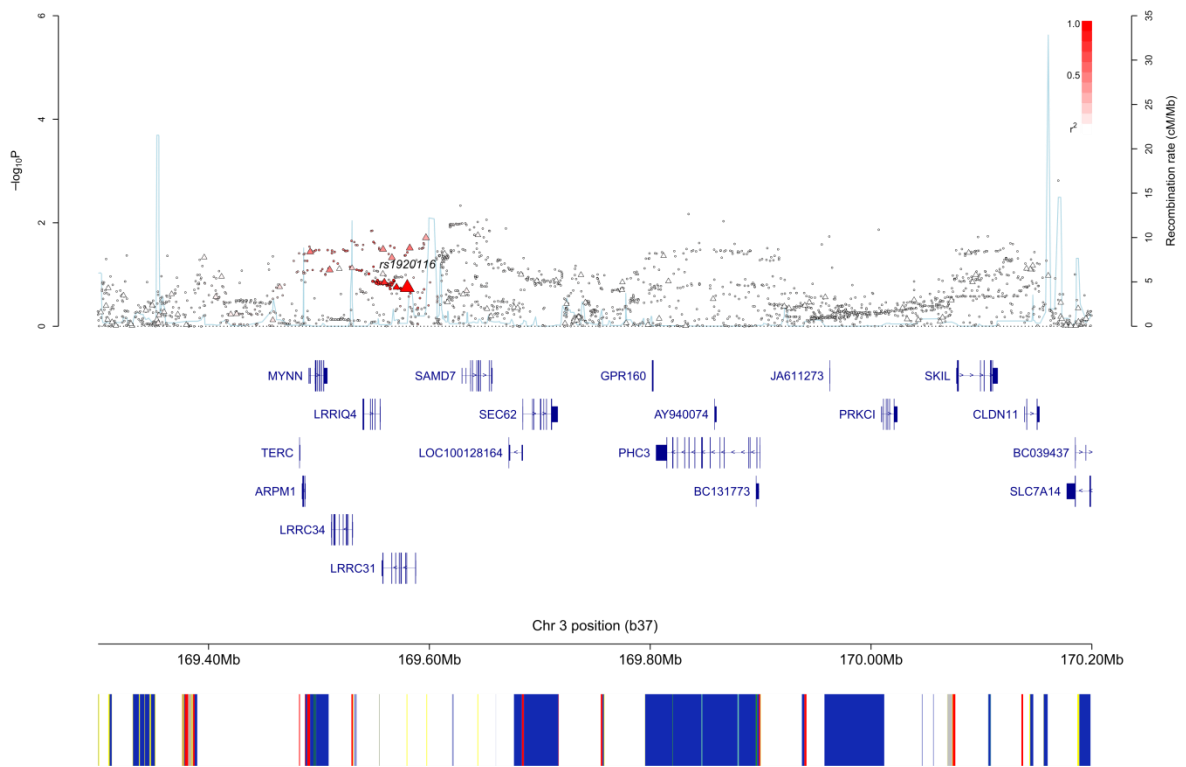

c) 3q26.2 , rs1920116 (non GBM)

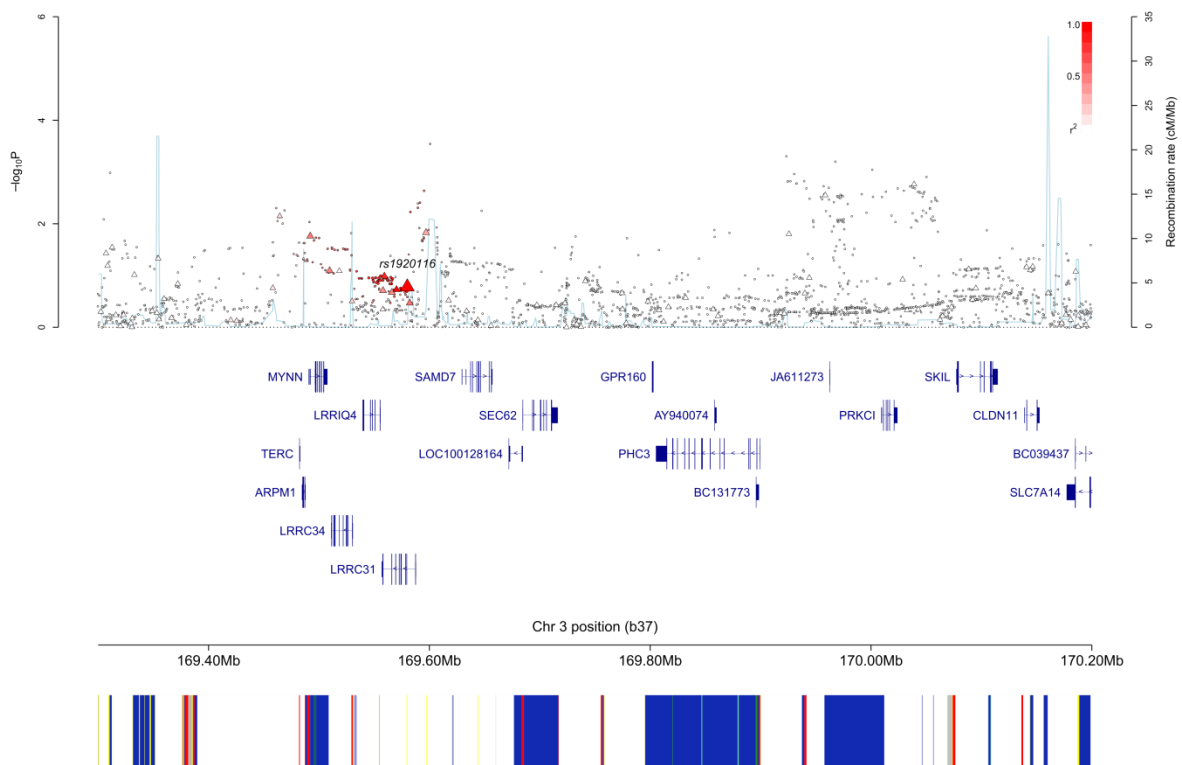

d)

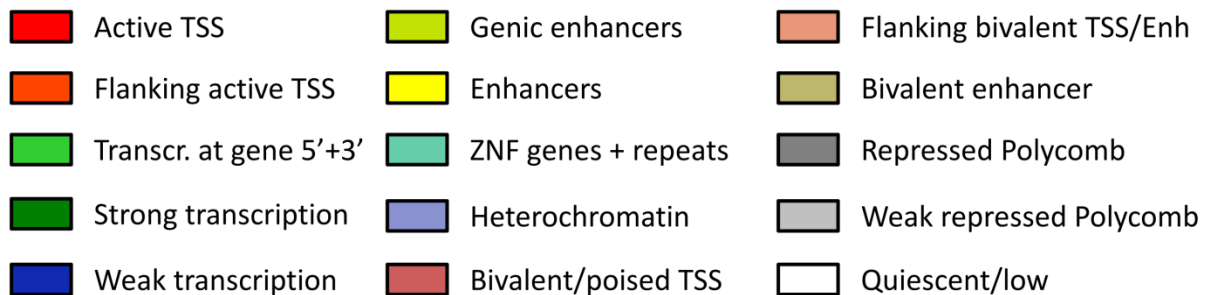

**Supplementary Figure 3: Regional plots of association results, recombination rates and chromatin state segmentation tracks for published glioma risk locus at 3q26.2 (rs1920116).** Results for: (a) All Glioma; (b) GBM; (c) non GBM). Plots show association results of both genotyped (triangles) and imputed (circles) SNPs in the GWAS samples and recombination rates.  $-\log_{10} P$  values (y axes) of the SNPs are shown according to their chromosomal positions (x axes). rs1920116 in each combined analysis is shown as a large circle or triangle (if imputed or directly genotyped respectively) and is labeled by its rsID. The color intensity of each symbol reflects the extent of LD with the top genotyped SNP, white ( $r^2 = 0$ ) through to dark red ( $r^2 = 1.0$ ). Genetic recombination rates, estimated using HapMap samples from Utah residents of western and northern European ancestry (CEU), are shown with a light blue line. Physical positions are based on NCBI build 37 of the human genome. Also shown are the relative positions of genes and transcripts mapping to the region of association. Genes have been redrawn to show their relative positions; therefore, maps are not to physical scale. Below each plot is a diagram of the exons and introns of the genes of interest, the associated SNPs and the chromatin state segmentation track (ChromHMM) for H1 neural progenitor cells derived from the epigenome roadmap project. (d) Legend file depicting chromatin states for chromHMM track.

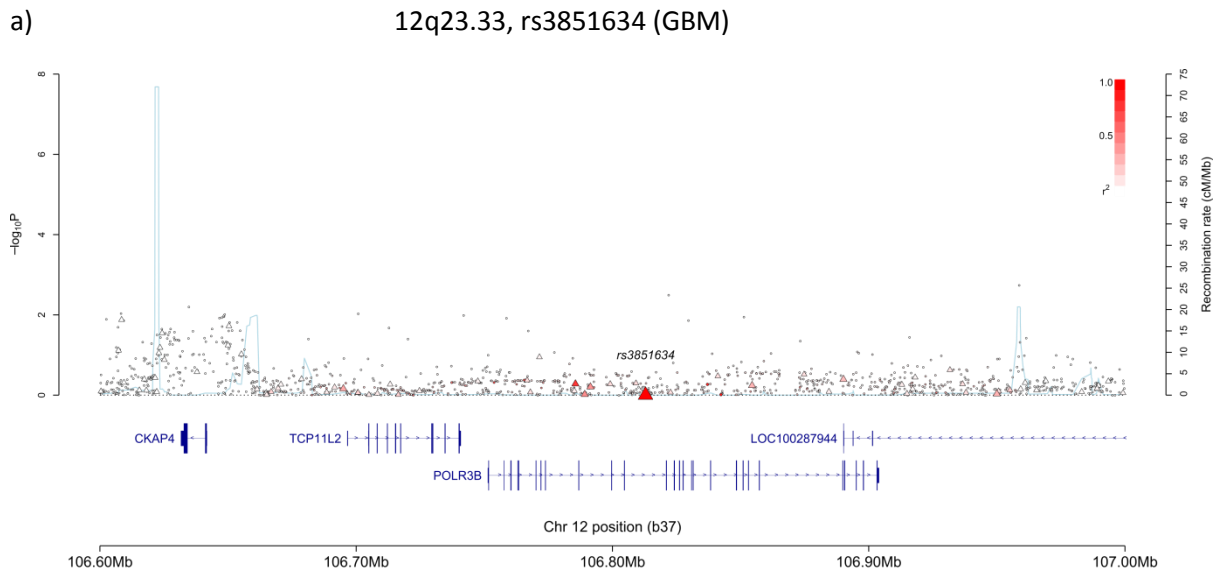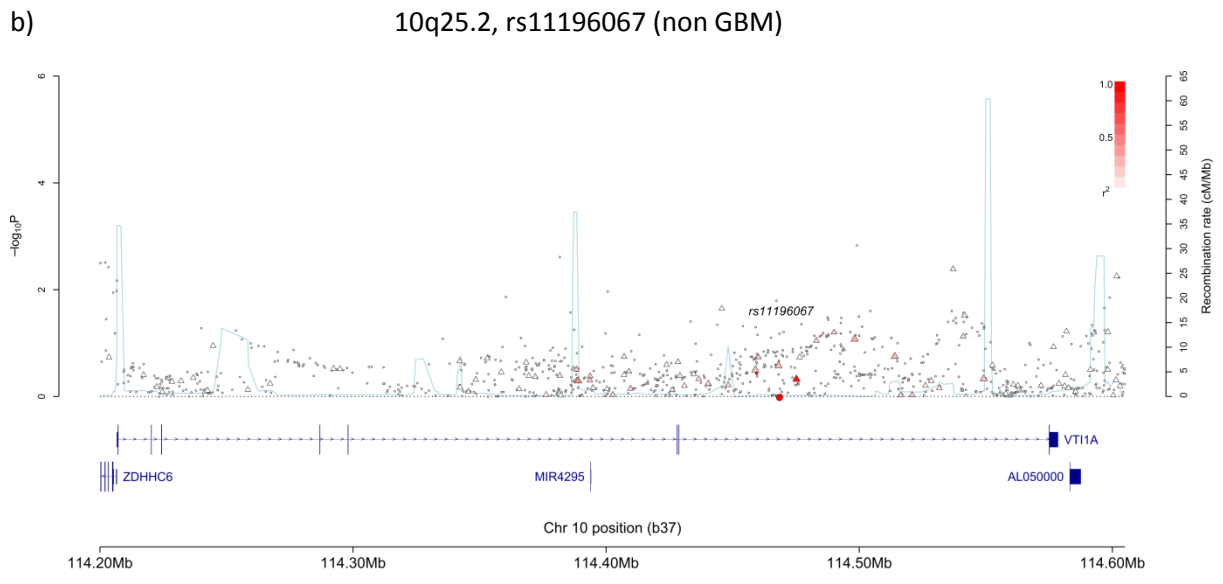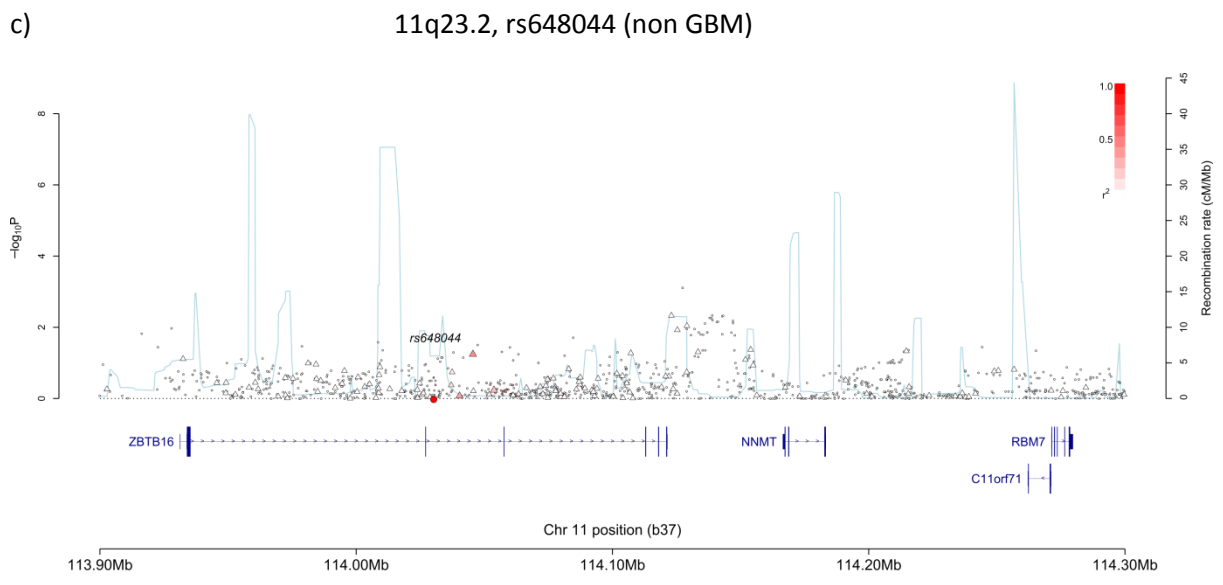

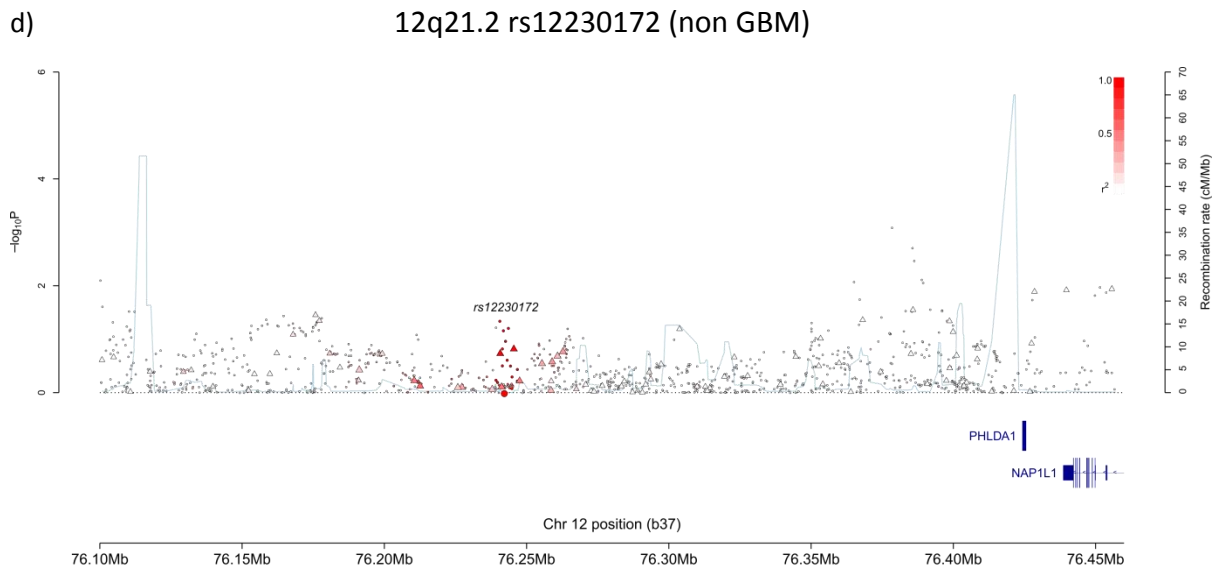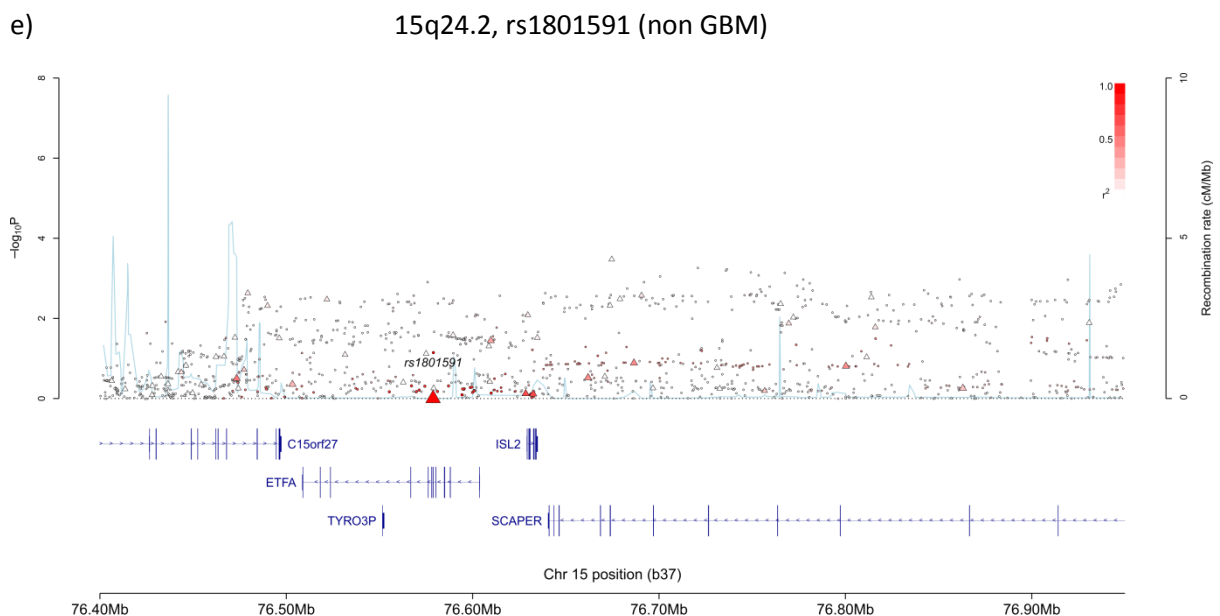

**Supplementary Figure 4: Regional plots of discovery-phase association results, recombination rates and chromatin state segmentation tracks for five glioma risk loci after adjusting for the lead SNP at each locus.** Results for: (a) 12q23.33, rs3851634 (GBM); (b) 10q25.2, rs11196067 (non GBM); (c) 11q23.2, rs648044 (non GBM); (d) 12q21.2 rs12230172 (non GBM) and (e) 15q24.2, rs1801591 (non GBM). Plots show association results of both genotyped (triangles) and imputed (circles) SNPs in the GWAS samples and recombination rates.  $-\log_{10} P$  values (y axes) of the SNPs are shown according to their chromosomal positions (x axes). The lead SNP being adjusted is shown as a large circle or triangle (if imputed or directly genotyped) and is labeled by its rsID. The color intensity of each symbol reflects the extent of LD with the top genotyped SNP, white ( $r^2 = 0$ ) through to dark red ( $r^2 = 1.0$ ). Genetic recombination rates, estimated using HapMap samples from Utah residents of western and northern European ancestry (CEU), are shown with a light blue line. Physical positions are based on NCBI build 37 of the human genome. Also shown are the relative positions of UCSC genes and transcripts mapping to the region of association. Genes have been redrawn to show their relative positions; therefore, maps are not to physical scale.

## Supplementary Tables

### A) Summary characteristics of the four GWAS datasets used in this study

| GWAS                       | French          | German                              | UK                   | USA                            |
|----------------------------|-----------------|-------------------------------------|----------------------|--------------------------------|
| <b>Cases (GBM/non-GBM)</b> | 1,423 (430/993) | 846 (431/415)                       | 631 (270/361)        | 1,247 (652/595)                |
| Study or Centre            | Paris           | Bonn                                | INTERPHONE           | MD Anderson                    |
| Average age                | 48              | 51                                  | 46                   | 47                             |
| Male/Female                | 816/607         | 474/372                             | 394/237              | 771/476                        |
| Illumina Chip              | HumanHap 660    | HumanHap 660                        | HumanHap 610<br>Quad | HumanHap 610 Quad              |
| <b>Controls</b>            | 1,190           | 1,310                               | 2,699                | 2,236                          |
| Study                      | SU.VI.MAX       | KORA, POPGEN & Heinz Nixdorf Recall | 1958 Birth<br>Cohort | CGEMs                          |
| Illumina Chip              | HumanHap 660    | HumanHap 550                        | Human 1M Duo         | HumanHap 240+300; HumanHap 500 |

**B) Details of imputation**

| GWAS                           | French                                                                                                                                  | German     | UK         | USA        |
|--------------------------------|-----------------------------------------------------------------------------------------------------------------------------------------|------------|------------|------------|
| <b>Imputation software</b>     | IMPUTEv2                                                                                                                                |            |            |            |
| <b>Reference panels</b>        | 1000 Genomes Project (1,092 individuals, Phase 1 integrated release version 3),<br>UK10K cohort (3,781 individuals, 2012-06-02 release) |            |            |            |
| <b>Association analysis</b>    | SNPTEST + META                                                                                                                          |            |            |            |
| <b>Size of inference panel</b> | 425,190                                                                                                                                 |            |            |            |
| <b>SNPS imputed*</b>           |                                                                                                                                         |            |            |            |
| All                            | 12,871,635                                                                                                                              | 13,162,915 | 11,427,443 | 13,317,150 |
| MAF >0.5%                      | 8,520,499                                                                                                                               | 8,624,585  | 8,427,548  | 8,526,605  |
| MAF <1%                        | 5,102,766                                                                                                                               | 5,282,022  | 3,708,327  | 5,533,481  |
| MAF 1-5%                       | 2,070,205                                                                                                                               | 2,103,955  | 2,022,204  | 2,062,418  |
| MAF >5%                        | 5,698,557                                                                                                                               | 5,776,844  | 5,696,827  | 5,721,165  |

**Supplementary Table 1: Summary characteristics of the four GWAS datasets and details of imputation.** Sample numbers are post-QC (as described previously<sup>1,2</sup>). A) Summary characteristics of the four GWAS datasets, B) Details of imputation. \* Passing filters of Information score > 0.7 and hardy-weinberg equilibrium  $P > 1 \times 10^{-5}$  in controls. MAF, minor allele frequency.



**Supplementary Table 2: Best association signals from previously reported glioma GWAS loci discovered in European populations.**

| Subtype    | Lead SNP    | Alleles       | Is   | Locus    | Published SNP | LD ( $r^2/D'$ ) | All Glioma             |                  |                        | GBM              |                        | Non-GBM          |  |
|------------|-------------|---------------|------|----------|---------------|-----------------|------------------------|------------------|------------------------|------------------|------------------------|------------------|--|
|            |             |               |      |          |               |                 | <i>P</i>               | OR (95% CI)      | <i>P</i>               | OR (95% CI)      | <i>P</i>               | OR (95% CI)      |  |
|            | rs1920116*  | G/ <u>A</u>   | -    | 3q26.2   | rs1920116     | -               | 0.088                  | 0.95 (0.89-1.01) | 0.179                  | 0.94 (0.87-1.03) | 0.166                  | 0.95 (0.88-1.02) |  |
| All glioma | rs10069690  | C/ <u>T</u>   | 0.78 | 5p15.33  | rs2736100     | 0.25/0.90       | 3.65x10 <sup>-20</sup> | 1.40 (1.30-1.50) | 3.00x10 <sup>-23</sup> | 1.63 (1.48-1.79) | 7.59x10 <sup>-7</sup>  | 1.25 (1.15-1.37) |  |
| GBM        | rs72709458  | C/ <u>T</u>   | 0.82 | 5p15.33  | rs2736100     | 0.10/1.00       | 4.35x10 <sup>-19</sup> | 1.41 (1.31-1.52) | 6.28x10 <sup>-24</sup> | 1.68 (1.52-1.86) | 7.52x10 <sup>-6</sup>  | 1.24 (1.13-1.36) |  |
| Non GBM    | rs10069690  | C/ <u>T</u>   | 0.78 | 5p15.33  | rs2736100     | 0.25/0.90       | 3.65x10 <sup>-20</sup> | 1.40 (1.30-1.50) | 3.00x10 <sup>-23</sup> | 1.63 (1.48-1.79) | 7.59x10 <sup>-7</sup>  | 1.25 (1.15-1.37) |  |
| All glioma | rs59060240  | T/ <u>TA</u>  | 0.86 | 7p11.2   | rs11979158    | -               | 2.28x10 <sup>-8</sup>  | 0.78 (0.72-0.85) | 4.48x10 <sup>-9</sup>  | 0.71 (0.63-0.80) | 3.38x10 <sup>-3</sup>  | 0.85 (0.77-0.95) |  |
| GBM        | rs59060240  | T/ <u>TA</u>  | 0.86 | 7p11.2   | rs11979158    | -               | 2.28x10 <sup>-8</sup>  | 0.78 (0.72-0.85) | 4.48x10 <sup>-9</sup>  | 0.71 (0.63-0.80) | 3.38x10 <sup>-3</sup>  | 0.85 (0.77-0.95) |  |
| Non GBM    | rs11974185  | A/ <u>T</u>   | 0.99 | 7p11.2   | rs11979158    | 1.00/1.00       | 3.16x10 <sup>-8</sup>  | 0.80 (0.74-0.87) | 1.77x10 <sup>-8</sup>  | 0.74 (0.67-0.82) | 2.09x10 <sup>-3</sup>  | 0.86 (0.78-0.95) |  |
| All glioma | rs75061358  | T/ <u>G</u>   | 0.90 | 7p11.2   | rs2252586     | 0.14/0.80       | 2.39x10 <sup>-11</sup> | 1.42 (1.28-1.57) | 5.57x10 <sup>-11</sup> | 1.59 (1.39-1.83) | 2.86x10 <sup>-6</sup>  | 1.36 (1.20-1.55) |  |
| GBM        | rs75061358  | T/ <u>G</u>   | 0.90 | 7p11.2   | rs2252586     | 0.14/0.80       | 2.39x10 <sup>-11</sup> | 1.42 (1.28-1.57) | 5.57x10 <sup>-11</sup> | 1.59 (1.39-1.83) | 2.86x10 <sup>-6</sup>  | 1.36 (1.20-1.55) |  |
| Non GBM    | rs75061358  | T/ <u>G</u>   | 0.90 | 7p11.2   | rs2252586     | 0.14/0.80       | 2.39x10 <sup>-11</sup> | 1.42 (1.28-1.57) | 5.57x10 <sup>-11</sup> | 1.59 (1.39-1.83) | 2.86x10 <sup>-6</sup>  | 1.36 (1.20-1.55) |  |
| All glioma | rs55705857  | A/ <u>G</u>   | 0.75 | 8q24     | rs4295627     | 0.16/1.00       | 6.01x10 <sup>-37</sup> | 2.19 (1.94-2.47) | 5.65x10 <sup>-3</sup>  | 1.28 (1.08-1.53) | 1.18x10 <sup>-62</sup> | 3.60 (3.10-4.19) |  |
| GBM        | rs57966090  | G/ <u>GA</u>  | 0.90 | 8q24     | rs4295627     | -               | 2.76x10 <sup>-8</sup>  | 0.83 (0.78-0.89) | 2.12x10 <sup>-4</sup>  | 0.85 (0.78-0.93) | 6.93x10 <sup>-7</sup>  | 0.81 (0.75-0.89) |  |
| Non GBM    | rs55705857  | A/ <u>G</u>   | 0.75 | 8q24     | rs4295627     | 0.16/1.00       | 6.01x10 <sup>-37</sup> | 2.19 (1.94-2.47) | 5.65x10 <sup>-3</sup>  | 1.28 (1.08-1.53) | 1.18x10 <sup>-62</sup> | 3.60 (3.10-4.19) |  |
| All glioma | rs2157719   | T/ <u>C</u>   | -    | 9p21.3   | rs4977756     | 0.75/0.96       | 2.89x10 <sup>-17</sup> | 1.28 (1.21-1.35) | 5.44x10 <sup>-12</sup> | 1.31 (1.21-1.41) | 1.69x10 <sup>-11</sup> | 1.27 (1.19-1.36) |  |
| GBM        | rs145929329 | A/ <u>ATT</u> | 0.80 | 9p21.3   | rs4977756     | 0.93/1.00       | 7.37x10 <sup>-15</sup> | 1.29 (1.21-1.38) | 5.03x10 <sup>-12</sup> | 1.35 (1.24-1.47) | 4.60x10 <sup>-8</sup>  | 1.25 (1.15-1.35) |  |
| Non GBM    | rs2157719   | T/ <u>C</u>   | -    | 9p21.3   | rs4977756     | 0.75/0.96       | 2.89x10 <sup>-17</sup> | 1.28 (1.21-1.35) | 5.44x10 <sup>-12</sup> | 1.31 (1.21-1.41) | 1.69x10 <sup>-11</sup> | 1.27 (1.19-1.36) |  |
| All glioma | rs12803321  | G/ <u>C</u>   | 0.98 | 11q23.3  | rs498872      | 0.18/1.00       | 2.20x10 <sup>-16</sup> | 0.78 (0.73-0.82) | 0.054                  | 0.93 (0.85-1.00) | 4.33x10 <sup>-25</sup> | 0.68 (0.63-0.73) |  |
| GBM        | rs1790192   | G/ <u>A</u>   | 0.79 | 11q23.3  | rs498872      | 0.09/0.36       | 3.23x10 <sup>-6</sup>  | 0.86 (0.80-0.91) | 0.020                  | 0.90 (0.83-0.98) | 3.58x10 <sup>-6</sup>  | 0.83 (0.76-0.90) |  |
| Non GBM    | rs12803321  | G/ <u>C</u>   | 0.98 | 11q23.3  | rs498872      | 0.18/1.00       | 2.20x10 <sup>-16</sup> | 0.78 (0.73-0.82) | 0.054                  | 0.93 (0.85-1.00) | 4.33x10 <sup>-25</sup> | 0.68 (0.63-0.73) |  |
| All glioma | rs35850753  | C/ <u>T</u>   | 0.87 | 17p13.1  | rs78378222    | 0.62/1.00       | 8.98x10 <sup>-20</sup> | 2.53 (2.07-3.08) | 3.91x10 <sup>-12</sup> | 2.79 (2.09-3.72) | 3.05x10 <sup>-16</sup> | 2.92 (2.26-3.78) |  |
| GBM        | rs35850753  | C/ <u>T</u>   | 0.87 | 17p13.1  | rs78378222    | 0.62/1.00       | 8.98x10 <sup>-20</sup> | 2.53 (2.07-3.08) | 3.91x10 <sup>-12</sup> | 2.79 (2.09-3.72) | 3.05x10 <sup>-16</sup> | 2.92 (2.26-3.78) |  |
| Non GBM    | rs8753      | C/ <u>T</u>   | 0.89 | 17p13.1  | rs78378222    | 0.33/0.74       | 2.02x10 <sup>-19</sup> | 2.50 (2.05-3.06) | 3.97x10 <sup>-10</sup> | 2.50 (1.88-3.34) | 8.06x10 <sup>-18</sup> | 3.09 (2.39-4.00) |  |
| All glioma | rs2236507   | C/ <u>G</u>   | 0.98 | 20q13.33 | rs6010620     | 0.95/0.99       | 9.26x10 <sup>-11</sup> | 0.79 (0.74-0.85) | 1.57x10 <sup>-13</sup> | 0.70 (0.64-0.77) | 2.63x10 <sup>-3</sup>  | 0.88 (0.80-0.96) |  |
| GBM        | rs6062302   | C/ <u>T</u>   | 0.98 | 20q13.33 | rs6010620     | 1.00/1.00       | 1.00x10 <sup>-10</sup> | 0.79 (0.74-0.85) | 1.22x10 <sup>-13</sup> | 0.70 (0.64-0.77) | 2.97x10 <sup>-3</sup>  | 0.88 (0.81-0.96) |  |
| Non GBM    | rs139919499 | CT/ <u>C</u>  | 0.90 | 20q13.33 | rs6010620     | -               | 2.65x10 <sup>-6</sup>  | 1.37 (1.20-1.56) | 1.02x10 <sup>-4</sup>  | 1.42 (1.19-1.70) | 5.41x10 <sup>-4</sup>  | 1.33 (1.13-1.57) |  |

**Supplementary Table 2: Best association signals from previously reported glioma GWAS loci discovered in European populations.** For loci with a genome-wide significant  $P$  value (i.e.  $< 5 \times 10^{-8}$ ), the most associated SNPs within the LD block for all glioma as well as GBM and non-GBM subtypes are reported. Linkage disequilibrium (LD) metrics are with respect to the initial reported and published SNPs at 3q26.2, 5p15.33, 7p11.2, 8q24, 9p21.3, 11q23.3, 17p13.1 and 20q13.33<sup>1-4</sup>. \* No genome-wide significant variants found in region, therefore reporting SNP as published. CI, confidence interval; OR, odds ratio.

| SNP         | Is   | Status  | N   | AA concordance |           | AB concordance |         | BB concordance |         | r <sup>2</sup> |
|-------------|------|---------|-----|----------------|-----------|----------------|---------|----------------|---------|----------------|
| rs11196067  | 0.99 | Case    | 187 | 97.62%         | (82/84)   | 96.59%         | (85/88) | 100.00%        | (18/18) | 0.98           |
|             |      | Control | 182 | 96.49%         | (55/57)   | 98.00%         | (97/99) | 100.00%        | (28/28) | 0.98           |
| rs12230172  | 1.00 | Case    | 191 | 100.00%        | (64/64)   | 100.00%        | (93/93) | 100.00%        | (34/34) | 1.00           |
|             |      | Control | 182 | 98.25%         | (56/57)   | 98.70%         | (76/77) | 96.00%         | (48/50) | 0.95           |
| rs12780046  | 0.88 | Case    | 177 | 95.70%         | (133/139) | 86.05%         | (37/43) | 100.00%        | (1/1)   | 0.83           |
|             |      | Control | 166 | 97.12%         | (135/139) | 87.10%         | (27/31) | NA             | (0/0)   | 0.84           |
| rs648044    | 0.87 | Case    | 150 | 89.29%         | (50/56)   | 91.36%         | (74/81) | 95%            | (19/20) | 0.90           |
|             |      | Control | 143 | 93.44%         | (57/61)   | 85.71%         | (60/70) | 72.73%         | (16/22) | 0.86           |
| rs78543262  | 0.79 | Case    | 180 | 98.78%         | (162/164) | 88.89%         | (16/18) | NA             | (0/0)   | 0.88           |
|             |      | Control | 176 | 100.00%        | (165/165) | 100.00%        | (11/11) | NA             | (0/0)   | 1.00           |
| rs141035288 | 0.86 | Case    | 191 | 89.53%         | (171/191) | 0%             | (0/17)  | 0%             | (0/3)   | NA             |
|             |      | Control | 183 | 92.17%         | (153/166) | 53.33%         | (16/30) | 0%             | (0/1)   | 0.51           |
| rs76178334  | 0.89 | Case    | 191 | 98.88%         | (176/178) | 86.67%         | (13/15) | NA             | (0/0)   | 0.86           |
|             |      | Control | 183 | 100.00%        | (174/174) | 100.00%        | (9/9)   | NA             | (0/0)   | 1.00           |
| rs117527984 | 0.96 | Case    | 191 | 97.35%         | (184/189) | 28.57%         | (2/7)   | NA             | (0/0)   | 0.28           |
|             |      | Control | 183 | 97.56%         | (160/164) | 81.82%         | (18/22) | 100.00%        | (1/1)   | 0.82           |
| rs4432939   | 0.99 | Case    | 192 | 100.00%        | (149/149) | 100.00%        | (39/39) | 100.00%        | (4/4)   | 1.00           |
|             |      | Control | 183 | 99.24%         | (130/131) | 97.78%         | (44/45) | 100.00%        | (8/8)   | 0.98           |
| rs182521816 | 0.74 | Case    | 176 | 98.28%         | (171/174) | 40.00%         | (2/5)   | NA             | (0/0)   | 0.32           |
|             |      | Control | 181 | 99.43%         | (173/174) | 87.50%         | (7/8)   | NA             | (0/0)   | 0.87           |
| rs138170678 | 0.80 | Case    | 188 | 97.34%         | (183/188) | 0.00%          | (0/5)   | NA             | (0/0)   | 0.00           |
|             |      | Control | 172 | 94.15%         | (161/171) | 9.09%          | (1/11)  | NA             | (0/0)   | 0.09           |
| rs145034266 | 0.72 | Case    | 157 | 97.95%         | (143/146) | 78.57%         | (11/14) | NA             | (0/0)   | 0.77           |
|             |      | Control | 173 | 97.52%         | (157/161) | 75.00%         | (12/16) | NA             | (0/0)   | 0.72           |

**Supplementary Table 3: Imputation quality scores and concordance between directly sequenced and imputed genotype AA, major homozygote; AB, heterozygote; BB, minor homozygote; Is, Information score giving an indication of imputation quality; N, number of comparisons with imputed genotype probability > 90%. r<sup>2</sup> indicates Pearson product momentum correlation coefficient between imputed and sequenced genotype.**

**Supplementary Table 4: Association between genotype and glioma risk for candidate SNPs selected for further investigation.**

| SNP         | Locus   | Alleles | Is   | Type    | MAF    |         | Status | Study       | All Glioma             |                  |                       | GBM              |                              | Non-GBM                 |  |
|-------------|---------|---------|------|---------|--------|---------|--------|-------------|------------------------|------------------|-----------------------|------------------|------------------------------|-------------------------|--|
|             |         |         |      |         | Case   | Control |        |             | P                      | OR (95% CI)      | P                     | OR (95% CI)      | P                            | OR (95% CI)             |  |
| rs141035288 | 3p14.3  | A/G     | 0.86 | Imputed | 0.0015 | 0.011   | 1      | Discovery   | 1.70x10 <sup>-13</sup> | 0.25 (0.17-0.37) | 3.69x10 <sup>-7</sup> | 0.32 (0.20-0.49) | 6.57x10 <sup>-8</sup>        | 0.30 (0.20-0.47)        |  |
| rs117527984 | 4p15.31 | A/T     | 0.96 | Imputed | 0.0067 | 0.014   | 1      | Discovery   | 8.48x10 <sup>-7</sup>  | 0.50 (0.38-0.66) | 2.67x10 <sup>-3</sup> | 0.58 (0.41-0.83) | 4.30x10 <sup>-5</sup>        | 0.50 (0.36-0.70)        |  |
| rs76178334  | 4q13.3  | C/G     | 0.89 | Imputed | 0.012  | 0.0086  | 3      | Discovery   | 7.17x10 <sup>-4</sup>  | 1.70 (1.25-2.32) | 7.74x10 <sup>-7</sup> | 2.79 (1.86-4.19) | 0.56                         | 1.13 (0.75-1.71)        |  |
|             |         |         |      |         |        |         |        | Replication | 0.55                   | 1.15 (0.73-1.81) | 0.51                  | 1.18 (0.71-1.96) | 0.47                         | 1.24 (0.69-2.23)        |  |
|             |         |         |      |         |        |         |        | Combined    | 1.73x10 <sup>-3</sup>  | 1.50 (1.16-1.94) | 2.05x10 <sup>-5</sup> | 1.99 (1.45-2.73) | 0.37                         | 1.17 (0.83-1.64)        |  |
| rs4432939   | 5q13.1  | A/G     | 0.99 | Imputed | 0.15   | 0.17    | 3      | Discovery   | 1.81x10 <sup>-6</sup>  | 0.83 (0.77-0.90) | 1.09x10 <sup>-5</sup> | 0.80 (0.72-0.88) | 1.93x10 <sup>-3</sup>        | 0.86 (0.79-0.95)        |  |
|             |         |         |      |         |        |         |        | Replication | 0.84                   | 1.01 (0.89-1.16) | 0.76                  | 1.03 (0.88-1.20) | 0.97                         | 1.00 (0.83-1.20)        |  |
|             |         |         |      |         |        |         |        | Combined    | 5.16x10 <sup>-5</sup>  | 0.87 (0.82-0.93) | 4.50x10 <sup>-4</sup> | 0.85 (0.79-0.94) | 5.28x10 <sup>-3</sup>        | 0.89 (0.82-0.97)        |  |
| rs182521816 | 6q16.3  | A/G     | 0.74 | Imputed | 0.013  | 0.0084  | 3      | Discovery   | 3.95x10 <sup>-5</sup>  | 2.00 (1.44-2.79) | 4.11x10 <sup>-7</sup> | 3.07 (1.99-4.75) | 0.034                        | 1.65 (1.04-2.63)        |  |
|             |         |         |      |         |        |         |        | Replication | 0.23                   | 0.73 (0.43-1.22) | 0.55                  | 0.84 (0.47-1.49) | 0.37                         | 0.71 (0.34-1.50)        |  |
|             |         |         |      |         |        |         |        | Combined    | 4.71x10 <sup>-3</sup>  | 1.50 (1.13-1.98) | 2.31x10 <sup>-4</sup> | 1.92 (1.36-2.72) | 0.19                         | 1.30 (0.88-1.94)        |  |
| rs138170678 | 9p22.3  | A/T     | 0.80 | Imputed | 0.0022 | 0.012   | 1      | Discovery   | 5.89x10 <sup>-13</sup> | 0.25 (0.17-0.37) | 7.68x10 <sup>-7</sup> | 0.32 (0.20-0.50) | 6.04x10 <sup>-8</sup>        | 0.29 (0.19-0.46)        |  |
| rs145034266 | 9q22.31 | C/T     | 0.72 | Imputed | 0.021  | 0.015   | 2      | Discovery   | 9.91x10 <sup>-4</sup>  | 1.53 (1.19-1.97) | 8.39x10 <sup>-9</sup> | 2.70 (1.93-3.79) | 0.82                         | 0.96 (0.69-1.33)        |  |
| rs12780046  | 10q24.2 | G/T     | 0.88 | Imputed | 0.11   | 0.09    | 3      | Discovery   | 7.77x10 <sup>-7</sup>  | 1.29 (1.17-1.43) | 7.65x10 <sup>-3</sup> | 1.21 (1.05-1.39) | 1.28x10 <sup>-6</sup>        | 1.37 (1.21-1.55)        |  |
|             |         |         |      |         |        |         |        | Replication | 0.84                   | 1.03 (0.88-1.20) | 0.86                  | 0.98 (0.82-1.18) | 0.38                         | 1.10 (0.89-1.36)        |  |
|             |         |         |      |         |        |         |        | Combined    | 1.49x10 <sup>-5</sup>  | 1.21 (1.11-1.32) | 0.043                 | 1.12 (1.00-1.25) | 4.03x10 <sup>-6</sup>        | 1.29 (1.16-1.44)        |  |
| rs11196067  | 10q25.2 | A/T     | 0.99 | Imputed | 0.38   | 0.41    | 3      | Discovery   | 6.67x10 <sup>-7</sup>  | 0.86 (0.81-0.91) | 0.06                  | 0.93 (0.86-1.00) | 1.54x10 <sup>-8</sup>        | 0.81 (0.76-0.87)        |  |
|             |         |         |      |         |        |         |        | Replication | 0.56                   | 0.97 (0.88-1.07) | 0.91                  | 0.99 (0.89-1.11) | 0.33                         | 0.93 (0.81-1.07)        |  |
|             |         |         |      |         |        |         |        | Combined    | 4.32x10 <sup>-6</sup>  | 0.89 (0.85-0.93) | 0.11                  | 0.95 (0.89-1.01) | <b>4.32x10<sup>-8</sup></b>  | <b>0.84 (0.79-0.89)</b> |  |
| rs648044    | 11q23.2 | C/T     | 0.87 | Imputed | 0.4    | 0.38    | 3      | Discovery   | 1.41x10 <sup>-3</sup>  | 1.11 (1.04-1.18) | 0.41                  | 1.04 (0.95-1.13) | 3.42x10 <sup>-8</sup>        | 1.24 (1.15-1.34)        |  |
|             |         |         |      |         |        |         |        | Replication | 0.97                   | 1.08 (0.97-1.19) | 0.59                  | 0.97 (0.86-1.09) | 4.16x10 <sup>-4</sup>        | 1.29 (1.12-1.48)        |  |
|             |         |         |      |         |        |         |        | Combined    | 5.29x10 <sup>-4</sup>  | 1.10 (1.04-1.16) | 0.32                  | 0.97 (0.90-1.03) | <b>6.26x10<sup>-11</sup></b> | <b>1.25 (1.17-1.34)</b> |  |
| rs12230172  | 12q21.2 | G/A     | 1.00 | Imputed | 0.45   | 0.46    | 3      | Discovery   | 4.44x10 <sup>-3</sup>  | 0.92 (0.87-0.97) | 0.76                  | 1.01 (0.94-1.09) | 4.82x10 <sup>-6</sup>        | 0.85 (0.79-0.91)        |  |
|             |         |         |      |         |        |         |        | Replication | 1.84x10 <sup>-6</sup>  | 0.78 (0.70-0.86) | 7.00x10 <sup>-3</sup> | 0.85 (0.76-0.96) | 3.59x10 <sup>-8</sup>        | 0.67 (0.58-0.77)        |  |
|             |         |         |      |         |        |         |        | Combined    | 1.57x10 <sup>-6</sup>  | 0.88 (0.84-0.93) | 0.22                  | 0.96 (0.91-1.02) | <b>7.53x10<sup>-11</sup></b> | <b>0.81 (0.76-0.86)</b> |  |

| SNP        | Locus   | Alleles | Is   | Type    | MAF   |         | Status | Study       | All Glioma            |                  |                             | GBM                     |                              | Non-GBM                 |  |
|------------|---------|---------|------|---------|-------|---------|--------|-------------|-----------------------|------------------|-----------------------------|-------------------------|------------------------------|-------------------------|--|
|            |         |         |      |         | Case  | Control |        |             | <i>P</i>              | OR (95% CI)      | <i>P</i>                    | OR (95% CI)             | <i>P</i>                     | OR (95% CI)             |  |
| rs12230172 | 12q21.2 | G/A     | 1.00 | Imputed | 0.45  | 0.46    | 3      | Discovery   | 4.44x10 <sup>-3</sup> | 0.92 (0.87-0.97) | 0.76                        | 1.01 (0.94-1.09)        | 4.82x10 <sup>-6</sup>        | 0.85 (0.79-0.91)        |  |
|            |         |         |      |         |       |         |        | Replication | 1.84x10 <sup>-6</sup> | 0.78 (0.70-0.86) | 7.00x10 <sup>-3</sup>       | 0.85 (0.76-0.96)        | 3.59x10 <sup>-8</sup>        | 0.67 (0.58-0.77)        |  |
|            |         |         |      |         |       |         |        | Combined    | 1.57x10 <sup>-6</sup> | 0.88 (0.84-0.93) | 0.22                        | 0.96 (0.91-1.02)        | <b>7.53x10<sup>-11</sup></b> | <b>0.81 (0.76-0.86)</b> |  |
| rs3851634  | 12q23.3 | T/C     | -    | Typed   | 0.27  | 0.3     | 3      | Discovery   | 6.02x10 <sup>-6</sup> | 0.86 (0.81-0.92) | 1.62x10 <sup>-7</sup>       | 0.80 (0.74-0.87)        | 0.039                        | 0.92 (0.85-1.00)        |  |
|            |         |         |      |         |       |         |        | Replication | 0.022                 | 0.88 (0.79-0.98) | 5.00x10 <sup>-3</sup>       | 0.83 (0.74-0.95)        | 0.57                         | 0.96 (0.83-1.11)        |  |
|            |         |         |      |         |       |         |        | Combined    | 4.07x10 <sup>-7</sup> | 0.87 (0.82-0.92) | <b>3.02x10<sup>-9</sup></b> | <b>0.81 (0.76-0.87)</b> | 0.037                        | 0.93 (0.87-1.00)        |  |
| rs1801591  | 15q24.2 | G/A     | -    | Typed   | 0.10  | 0.09    | 3      | Discovery   | 5.41x10 <sup>-5</sup> | 1.21 (1.11-1.34) | 0.27                        | 1.08 (0.94-1.23)        | 1.29x10 <sup>-7</sup>        | 1.38 (1.22-1.55)        |  |
|            |         |         |      |         |       |         |        | Replication | 0.16                  | 1.13 (0.95-1.33) | 0.89                        | 1.01 (0.83-1.23)        | 0.013                        | 1.31 (1.06-1.63)        |  |
|            |         |         |      |         |       |         |        | Combined    | 2.75x10 <sup>-5</sup> | 1.20 (1.10-1.30) | 0.32                        | 1.06 (0.95-1.18)        | <b>5.71x10<sup>-9</sup></b>  | <b>1.36 (1.23-1.51)</b> |  |
| rs78543262 | 19q12   | A/G     | 0.79 | Imputed | 0.018 | 0.013   | 3      | Discovery   | 5.12x10 <sup>-5</sup> | 1.72 (1.32-2.23) | 0.37                        | 1.19 (0.82-1.73)        | 6.22x10 <sup>-8</sup>        | 2.46 (1.77-3.40)        |  |
|            |         |         |      |         |       |         |        | Replication | 0.53                  | 0.90 (0.63-1.26) | 0.83                        | 0.96 (0.65-1.41)        | 0.58                         | 0.87 (0.54-1.42)        |  |
|            |         |         |      |         |       |         |        | Combined    | 4.40x10 <sup>-3</sup> | 1.35 (1.10-1.67) | 0.62                        | 1.07 (0.82-1.40)        | 2.88x10 <sup>-5</sup>        | 1.78 (1.36-2.33)        |  |

**Supplementary Table 4: Association between genotype and glioma risk for candidate SNPs selected for further investigation.** Odds ratios derived with respect to the minor allele, highlighted in bold. MAF, minor allele frequency in discovery series. Shown are discovery association *P* values from meta-analysis of four GWAS datasets, as well as replication and combined meta-analysis *P* values for SNPs taken forward for replication genotyping. Status indicates whether SNP taken forward for replication genotyping (1, not taken forward for replication as poor concordance between imputed and sequenced genotype; 2, not taken forward for replication as repetitive region prevented design of successful genotyping primers; 3, taken forward for replication). Associations in the combined meta-analysis reaching genome-wide significance (i.e.  $P < 5 \times 10^{-8}$ ) are highlighted in bold.

Supplementary Table 5: Genomic annotation of rs648044, rs11196067, rs1801591, rs3851634 and rs12230172.

| Locus   | SNP               | Pos (hg19) | r <sup>2</sup> | D'   | GERP  | CADD  | Gene                    | Annotation | RegulomeDB | FANTOM5      | Super-enhancer        |
|---------|-------------------|------------|----------------|------|-------|-------|-------------------------|------------|------------|--------------|-----------------------|
| 10q25.2 | <b>rs11196067</b> | 114469065  | 1.00           | 1.00 | 0.72  | 4.79  | <i>VTI1A</i>            | intronic   | 2b         | enhancer_tss |                       |
|         | rs10885375        | 114475189  | 0.94           | 1.00 | 2.16  | 8.20  | <i>VTI1A</i>            | intronic   | 6          |              |                       |
| 15q24.2 | rs17456573        | 76476361   | 0.81           | 0.94 | -1.47 | 3.14  | <i>C15orf27</i>         | intronic   | 5          |              | brain_cingulate_gyrus |
|         | rs79495512        | 76492337   | 0.89           | 0.95 | -3.72 | 2.45  | <i>C15orf27</i>         | intronic   | 5          |              |                       |
|         | rs77815174        | 76514896   | 0.91           | 0.95 | 0.56  | 10.71 | <i>C15orf27</i>         | intronic   | 5          |              |                       |
|         | rs77387260        | 76537476   | 0.92           | 0.97 | 3.61  | 10.59 | <i>ETFA</i>             | intronic   | 6          |              |                       |
|         | rs77633900        | 76538459   | 0.92           | 0.97 | 0.23  | 3.97  | <i>ETFA</i>             | intronic   | NA         |              |                       |
|         | rs2456074         | 76555599   | 0.83           | 1.00 | 0.11  | 1.19  | <i>ETFA</i>             | intronic   | 4          |              |                       |
|         | rs2469539         | 76567484   | 0.83           | 1.00 | 0.5   | 4.15  | <i>ETFA</i>             | intronic   | 5          |              |                       |
|         | rs2469538         | 76570143   | 0.83           | 1.00 | 0.23  | 1.56  | <i>ETFA</i>             | intronic   | NA         |              |                       |
|         | rs8042255         | 76571610   | 0.83           | 1.00 | 0.15  | 4.07  | <i>ETFA</i>             | intronic   | NA         |              |                       |
|         | rs2469214         | 76574628   | 0.84           | 1.00 | 1.21  | 2.85  | <i>ETFA</i>             | intronic   | NA         |              |                       |
|         | <b>rs1801591</b>  | 76578762   | 1.00           | 1.00 | 5.65  | 29.90 | <i>ETFA</i>             | missense   | 3a         |              |                       |
|         | rs2291449         | 76579234   | 1.00           | 1.00 | -4.11 | 4.09  | <i>ETFA</i>             | intronic   | 5          |              |                       |
|         | rs2456067         | 76581418   | 0.84           | 1.00 | -0.84 | 0.26  | <i>ETFA</i>             | intronic   | 5          |              |                       |
|         | rs2456066         | 76587371   | 0.83           | 1.00 | 1.43  | 5.63  | <i>ETFA</i>             | intronic   | 5          |              |                       |
|         | rs74805465        | 76594595   | 0.98           | 1.00 | -1.3  | 1.75  | <i>ETFA</i>             | intronic   | 6          |              |                       |
|         | rs59673486        | 76594917   | 0.83           | 1.00 | NA    | NA    | <i>ETFA</i>             | intronic   | NA         |              |                       |
|         | rs2456063         | 76595549   | 0.83           | 1.00 | 0.17  | 1.02  | <i>ETFA</i>             | intronic   | 6          |              |                       |
|         | rs144886912       | 76595860   | 0.83           | 1.00 | NA    | NA    | <i>ETFA</i>             | intronic   | 5          |              |                       |
|         | rs2956875         | 76599041   | 0.83           | 1.00 | 1.28  | 0.35  | <i>ETFA</i>             | intronic   | NA         |              |                       |
|         | rs2469211         | 76599892   | 0.83           | 1.00 | -0.98 | 1.49  | <i>ETFA</i>             | intronic   | NA         |              |                       |
|         | rs2460158         | 76600222   | 0.83           | 1.00 | 0.95  | 3.24  | <i>ETFA</i>             | intronic   | 6          |              |                       |
|         | rs2469573         | 76601049   | 0.83           | 1.00 | -1.42 | 2.14  | <i>ETFA</i>             | intronic   | NA         |              |                       |
|         | rs2469212         | 76601075   | 0.83           | 1.00 | 2.78  | 8.73  | <i>ETFA</i>             | intronic   | NA         |              |                       |
|         | rs78185702        | 76610235   | 0.97           | 1.00 | -1.87 | 0.02  | 6.4kb 5' of <i>ETFA</i> | intergenic | 5          |              |                       |
|         | rs2469215         | 76611933   | 0.80           | 1.00 | 0.86  | 0.76  | 8.1kb 5' of <i>ETFA</i> | intergenic | NA         |              |                       |

| Locus    | SNP               | Pos (hg19) | r <sup>2</sup> | D'    | GERP  | CADD  | Gene                    | Annotation | RegulomeDB | FANTOM5           | Super-enhancer |
|----------|-------------------|------------|----------------|-------|-------|-------|-------------------------|------------|------------|-------------------|----------------|
|          | rs6495200         | 76611934   | 0.80           | -1.00 | -1.71 | 0.20  | 8.1kb 5' of <i>ETFA</i> | intergenic | NA         |                   |                |
|          | rs2469216         | 76613477   | 0.80           | 1.00  | 0.09  | 1.12  | 9.7kb 5' of <i>ETFA</i> | intergenic | 5          |                   |                |
|          | rs2469552         | 76615481   | 0.80           | 1.00  | 0.5   | 0.41  | 12kb 5' of <i>ETFA</i>  | intergenic | NA         |                   |                |
| 12q33.33 | <b>rs3851634</b>  | 106812902  | 1.00           | 1.00  | 2.37  | 9.61  | <i>POLR3B</i>           | intronic   | 5          | enhancer_tss      |                |
|          | rs11112997        | 106842558  | 0.89           | 0.97  | 1.85  | 4.23  | <i>POLR3B</i>           | intronic   | NA         | enhancer_tss      |                |
| 12q21.2  | rs140387126       | 76233187   | 0.88           | 0.99  | NA    | NA    | <i>RP11-114H23.1</i>    | intronic   | 6          | enhancer_tss      |                |
|          | rs12426679        | 76237987   | 0.88           | 1.00  | -3.27 | 2.85  | <i>RP11-114H23.1</i>    | intronic   | 4          | enhancer_tss      |                |
|          | rs12426691        | 76238046   | 0.88           | 1.00  | -1.36 | 4.92  | <i>RP11-114H23.1</i>    | intronic   | 4          | enhancer_tss      |                |
|          | rs11180710        | 76238406   | 0.89           | 1.00  | -6.71 | 2.69  | <i>RP11-114H23.1</i>    | intronic   | 6          | enhancer_tss      |                |
|          | rs1565765         | 76238855   | 0.89           | 1.00  | -0.98 | 2.74  | <i>RP11-114H23.1</i>    | intronic   | NA         | enhancer_tss      |                |
|          | rs1463754         | 76239432   | 1.00           | 1.00  | -0.66 | 3.80  | <i>RP11-114H23.1</i>    | intronic   | 3a         | enhancer_tss      |                |
|          | rs1493795         | 76239977   | 1.00           | 1.00  | 1.54  | 5.42  | <i>RP11-114H23.1</i>    | intronic   | NA         | enhancer_tss      |                |
|          | rs11180712        | 76240731   | 1.00           | 1.00  | -5.86 | 0.86  | <i>RP11-114H23.1</i>    | intronic   | NA         | enhancer_tss      |                |
|          | rs11180713        | 76240797   | 1.00           | 1.00  | -1.24 | 3.69  | <i>RP11-114H23.1</i>    | intronic   | NA         | enhancer_tss      |                |
|          | rs10879991        | 76241678   | 1.00           | 1.00  | -0.03 | 4.05  | <i>RP11-114H23.1</i>    | intronic   | 5          | enhancer_tss      |                |
|          | rs10879992        | 76241681   | 1.00           | 1.00  | 1.25  | 4.92  | <i>RP11-114H23.1</i>    | intronic   | 5          | enhancer_tss      |                |
|          | rs10879993        | 76242047   | 1.00           | 1.00  | -0.82 | 11.05 | <i>RP11-114H23.1</i>    | intronic   | 5          | enhancer_tss      |                |
|          | <b>rs12230172</b> | 76242675   | 1.00           | 1.00  | 3.41  | 18.76 | <i>RP11-114H23.1</i>    | intronic   | 5          | enhancer_tss      |                |
|          | rs12227868        | 76242802   | 1.00           | 1.00  | 0.53  | 2.39  | <i>RP11-114H23.1</i>    | intronic   | 5          | enhancer_tss      |                |
|          | rs1493794         | 76243379   | 1.00           | 1.00  | 1.57  | 7.17  | <i>RP11-114H23.1</i>    | intronic   | NA         | enhancer_tss      |                |
|          | rs11180714        | 76243801   | 1.00           | 1.00  | 0.38  | 4.42  | <i>RP11-114H23.1</i>    | intronic   | 5          | enhancer_tss      |                |
|          | rs35080799        | 76244541   | 1.00           | 1.00  | 1.01  | 6.38  | <i>RP11-114H23.1</i>    | intronic   | 4          | enhancer_tss      |                |
|          | rs12229980        | 76245026   | 1.00           | 1.00  | 1.99  | 7.91  | <i>RP11-114H23.1</i>    | intronic   | 4          | enhancer_tss      | u87_GBM_cells  |
|          | rs34439598        | 76245089   | 1.00           | 1.00  | 0.34  | 1.93  | <i>RP11-114H23.1</i>    | intronic   | 5          | enhancer_tss      | u87_GBM_cells  |
|          | rs11180719        | 76245517   | 0.99           | 1.00  | 2.12  | 7.32  | <i>RP11-114H23.1</i>    | intronic   | 5          | enhancer_tss      | u87_GBM_cells  |
|          | rs1493792         | 76246953   | 0.99           | 1.00  | -2.49 | 9.70  | <i>RP11-114H23.1</i>    | intronic   | 5          | enhancer_tss      | u87_GBM_cells  |
|          | rs1493791         | 76246959   | 0.99           | 1.00  | 2.91  | 12.30 | <i>RP11-114H23.1</i>    | intronic   | 5          | enhancer_tss      | u87_GBM_cells  |
| 11q23.2  | <b>rs648044</b>   | 114030799  | 1.00           | 1.00  | -9.32 | 6.87  | <i>ZBTB16</i>           | intronic   | 2b         | enhancer_promoter | Brain (all)    |

**Supplementary Table 5: Genomic annotation of rs648044, rs11196067, rs1801591, rs3851634 and rs12230172.** Data are shown for sentinel SNPs and their proxies ( $r^2 > 0.8$  in 1000 Genomes EUR Phase 1 data) with RegulomeDB scores reflecting evidence of histone marks, DNase hypersensitivity sites or transcription factor occupancy. Also indicated are genomic evolutionary rate profiling (GERP) scores and combined annotation dependent depletion (CADD) scores as well as overlap with FANTOM5 enhancers<sup>5</sup> and super-enhancers as predicted by Hnisz et al<sup>6</sup>. Chr, chromosome; LD, linkage disequilibrium; Pos, position; tss, transcription start site. RegulomeDB scores: 2b, TF binding + any motif + Dnase Footprint + Dnase peak; 4, TF binding + DNase peak; 5, TF binding or Dnase peak; 6, other binding or Dnase peak.



| SNP      | Correlation with<br>rs648044<br>( $r^2/D'$ ) | Chr:position   | Genotype<br>count<br>( <u>AA</u> / <u>AB</u> / <u>BB</u> ) | ZW10 expression |           |       | $P_{trend}$           |
|----------|----------------------------------------------|----------------|------------------------------------------------------------|-----------------|-----------|-------|-----------------------|
|          |                                              |                |                                                            | <u>AA</u>       | <u>AB</u> | BB    |                       |
| rs648044 | -                                            | 11:114,030,799 | 43/141/98                                                  | 717             | 802       | 936   | $5.72 \times 10^{-5}$ |
| rs500629 | 0.52/0.85                                    | 11:114,045,560 | 45/164/180                                                 | 698             | 804       | 866.5 | 0.0020                |
| rs503434 | 0.45/0.74                                    | 11:114,052,449 | 71/187/125                                                 | 707             | 831       | 868   | $3.03 \times 10^{-4}$ |
| rs619151 | 0.47/0.84                                    | 11:114,061,414 | 29/145/173                                                 | 698             | 755       | 864   | 0.0035                |
| rs526497 | 0.50/0.89                                    | 11:114,071,287 | 35/140/143                                                 | 690             | 790       | 865   | 0.0014                |
| rs661374 | 0.43/0.74                                    | 11:114,040,325 | 68/182/130                                                 | 700.5           | 835       | 866   | $2.65 \times 10^{-4}$ |

**Supplementary Table 6: Association between rs648044 proxy genotype and ZW10 expression level in LGG tumours.** Genotypes of SNPs correlated with rs648044 ( $r^2 > 0.4$ ) were assessed for association with ZW10 expression in low grade glioma (LGG) TCGA tumours by the Kruskal-Wallis trend test. Median expression counts per genotype are given, with the risk allele for each SNP underlined. Chr, chromosome.

| Gene                            | LGG (286 cases)         |           |               |           | GBM (273 cases)              |          |               |          |
|---------------------------------|-------------------------|-----------|---------------|-----------|------------------------------|----------|---------------|----------|
|                                 | Mutation                | Deletion  | Amplification | Total     | Mutation                     | Deletion | Amplification | Total    |
| <i>VTI1A</i> (10q25.2)          | 0                       | 6         | 0             | 6         | 0                            | 0        | 0             | 0        |
| <i>ZBTB16</i> (11q23.2)         | 0                       | 0         | 3             | 3         | 0                            | 0        | 2             | 2        |
| <i>PHLDA1</i> (12q21.2)         | 0                       | 0         | 0             | 0         | 1                            | 1        | 2             | 4        |
| <i>POLR3B</i> (12q23.3)         | 3<br>(R768C<br>2*L372F) | 3         | 1             | 7         | 1<br>(P370L)<br>1<br>(D483N) | 0        | 0             | 1        |
| <i>ETFA</i> (15q24.2)           | 0                       | 2         | 1             | 3         | 0                            | 0        | 0             | 0        |
| <i>PHLDA1</i> and <i>POLR3B</i> | 0                       | 2         | 1             | 3         | 0                            | 0        | 0             | 0        |
| <i>POLR3B</i> and <i>ZBTB16</i> | 0                       | 0         | 0             | 0         | 0                            | 0        | 1             | 1        |
| <b>TOTAL</b>                    | <b>3</b>                | <b>13</b> | <b>6</b>      | <b>22</b> | <b>2</b>                     | <b>1</b> | <b>6</b>      | <b>8</b> |

**Supplementary Table 7: Somatic alterations in low grade glioma (LGG) and GBM tumours from the cancer genome atlas.** The cBioPortal was interrogated for carriers of mutations, deletions and amplifications affecting target genes in a sample set of 286 low grade glioma (LGG) and 273 GBM TCGA samples.

| Locus                                    | SNP         | Control<br>MAF | Reference    | All glioma                           |                                             | GBM                                  |                                             | Non GBM                              |                                             |
|------------------------------------------|-------------|----------------|--------------|--------------------------------------|---------------------------------------------|--------------------------------------|---------------------------------------------|--------------------------------------|---------------------------------------------|
|                                          |             |                |              | Relative risk<br>per minor<br>allele | % of total<br>variance in risk<br>explained | Relative risk<br>per minor<br>allele | % of total<br>variance in risk<br>explained | Relative risk<br>per minor<br>allele | % of total<br>variance in risk<br>explained |
| <b>Previously reported loci</b>          |             |                |              |                                      |                                             |                                      |                                             |                                      |                                             |
| 5p15.33                                  | rs72709458  | 0.21           | This study   | 1.41                                 | 2.92                                        | 1.68                                 | 6.65                                        | 1.24                                 | 1.14                                        |
| 7p11.2                                   | rs59060240  | 0.16           | This study   | 0.78                                 | 1.24                                        | 0.71                                 | 2.35                                        | 0.85                                 | 0.53                                        |
| 7p11.2                                   | rs75061358  | 0.08           | This study   | 1.42                                 | 1.36                                        | 1.59                                 | 2.37                                        | 1.36                                 | 1.04                                        |
| 8q24                                     | rs55705857  | 0.06           | <sup>7</sup> | 2.50                                 | 7.31                                        | 1.30                                 | 0.60                                        | 4.30                                 | 18.53                                       |
| 9p21.3                                   | rs2157719   | 0.43           | This study   | 1.28                                 | 2.25                                        | 1.31                                 | 2.69                                        | 1.28                                 | 2.25                                        |
| 11q23.3                                  | rs12803321  | 0.35           | This study   | 0.78                                 | 2.11                                        | 0.93                                 | 0.18                                        | 0.68                                 | 5.09                                        |
| 17p13.1                                  | rs78378222  | 0.02           | <sup>8</sup> | 3.74                                 | 4.40                                        | 5.59                                 | 7.49                                        | 5.01                                 | 6.57                                        |
| 20q13.3                                  | rs6062302   | 0.23           | This study   | 0.79                                 | 1.46                                        | 0.70                                 | 3.34                                        | 0.88                                 | 0.43                                        |
|                                          |             | <b>TOTAL</b>   |              |                                      | <b>23.04</b>                                |                                      | <b>25.67</b>                                |                                      | <b>35.58</b>                                |
| <b>Loci first reported in this study</b> |             |                |              |                                      |                                             |                                      |                                             |                                      |                                             |
| 10q25.2                                  | rs111696067 | 0.41           | This study   | 0.89                                 | 0.49                                        | 0.95                                 | 0.10                                        | 0.84                                 | 1.11                                        |
| 11q23.2                                  | rs648044    | 0.38           | This study   | 1.10                                 | 0.32                                        | 0.97                                 | 0.03                                        | 1.25                                 | 1.76                                        |
| 12q21.2                                  | rs12230172  | 0.46           | This study   | 0.88                                 | 0.61                                        | 0.96                                 | 0.06                                        | 0.81                                 | 1.66                                        |
| 15q24.2                                  | rs1801591   | 0.09           | This study   | 1.20                                 | 1.05                                        | 1.06                                 | 0.11                                        | 1.36                                 | 2.98                                        |
| 12q23.3                                  | rs3851634   | 0.30           | This study   | 0.79                                 | 1.46                                        | 0.70                                 | 3.34                                        | 0.88                                 | 0.43                                        |
|                                          |             | <b>TOTAL</b>   |              |                                      | <b>2.71</b>                                 |                                      | <b>0.84</b>                                 |                                      | <b>7.58</b>                                 |
|                                          |             | <b>OVERALL</b> |              |                                      | <b>25.76</b>                                |                                      | <b>26.52</b>                                |                                      | <b>43.15</b>                                |

**Supplementary Table 8: Individual variance in risk associated with glioma SNPs.** For each glioma risk locus, the relative risk per minor allele of the highest associated SNP is given. If the highest-associated SNP in a given locus has been published, relative risks are derived from published studies, otherwise they are derived from this study. MAF, minor allele frequency.

| Pathway/gene set name                                    | P-value | FDR    |
|----------------------------------------------------------|---------|--------|
| <b>All glioma</b>                                        |         |        |
| CELL CYCLE CHECKPOINT GO 0000075                         | < 0.001 | 0.0020 |
| G1 TO S CELL CYCLE REACTOME                              | < 0.001 | 0.021  |
| HSA00230 PURINE METABOLISM                               | < 0.001 | 0.026  |
| CELL CORTEX PART GO:0044448                              | < 0.001 | 0.029  |
| HSA00600 SPHINGOLIPID METABOLISM                         | < 0.001 | 0.055  |
| ENERGY DERIVATION BY OXIDATION OF ORGANIC COMPOUNDS      | 0.0010  | 0.056  |
| REGULATION OF MITOSIS                                    | 0.0010  | 0.057  |
| G1PATHWAY                                                | 0.0020  | 0.060  |
| REGULATION OF CELL CYCLE                                 | < 0.001 | 0.061  |
| HSA05219 BLADDER CANCER                                  | < 0.001 | 0.070  |
| ORGANELLE OUTER MEMBRANE                                 | 0.0020  | 0.071  |
| HSA00240 PYRIMIDINE METABOLISM                           | 0.0010  | 0.075  |
| TRANSCRIPTION INITIATION FROM RNA POLYMERASE II PROMOTER | 0.0030  | 0.077  |
| HSA04110 CELL CYCLE                                      | < 0.001 | 0.098  |
| <b>GBM glioma</b>                                        |         |        |
| HSA00240 PYRIMIDINE METABOLISM                           | < 0.001 | 0.010  |
| HSA00230 PURINE METABOLISM                               | < 0.001 | 0.011  |
| HSA04610 COMPLEMENT AND COAGULATION CASCADES             | < 0.001 | 0.072  |
| CELL CELL ADHESION                                       | < 0.001 | 0.080  |
| HSA04330 NOTCH SIGNALING PATHWAY                         | < 0.001 | 0.082  |
| REGULATION OF PHOSPHORYLATION                            | < 0.001 | 0.094  |
| MACROMOLECULE CATABOLIC PROCESS                          | 0.0010  | 0.095  |
| BIOPOLYMER CATABOLIC PROCESS                             | 0.0010  | 0.095  |
| <b>Non GBM glioma</b>                                    |         |        |
| CELL CYCLE CHECKPOINT GO 0000075                         | < 0.001 | 0.015  |
| TRANSCRIPTION INITIATION FROM RNA POLYMERASE II PROMOTER | < 0.001 | 0.021  |
| G1PATHWAY                                                | < 0.001 | 0.021  |
| G1 TO S CELL CYCLE REACTOME                              | 0.0020  | 0.076  |
| REGULATION OF MITOSIS                                    | 0.0010  | 0.083  |
| ENERGY DERIVATION BY OXIDATION OF ORGANIC COMPOUNDS      | 0.0010  | 0.083  |
| RNA TRANSCRIPTION REACTOME                               | 0.0010  | 0.088  |
| MITOCHONDRIAL PART                                       | 0.0010  | 0.095  |
| KERATINOCYTEPATHWAY                                      | 0.0010  | 0.096  |

**Supplementary Table 9: Biological pathways enriched for glioma GWAS association signals.** Shown are all pathways with false discovery rate (FDR) < 0.10.

| Type       | Primer             | Sequence (5'-3')                                    |
|------------|--------------------|-----------------------------------------------------|
| Genotyping | rs648044_A         | GAAGGTGACCAAGTTCATGCTGCTGTTTTCTTCTGCTCAGCA          |
|            | rs648044_G         | GAAGGTCGGAGTCAACGGATTCTGCTGTTTTCTTCTGCTCAGCG        |
|            | rs648044_Common    | CTAGCCAGGAAGTGAGAGCCGTT                             |
| Sequencing | rs648044_Forward   | AGGCTGTGGAGAAGTGAGTC                                |
|            | rs648044_Reverse   | ACAAACACAGGCAATGCTCG                                |
| Genotyping | rs1801591_A        | GAAGGTGACCAAGTTCATGCTTGTGCTGCAGCATCAAAGGATA         |
|            | rs1801591_G        | GAAGGTCGGAGTCAACGGATTGTTGCTGCAGCATCAAAGGATG         |
|            | rs1801591_Common   | GTGAAGTGTGATGAGAAAGTGAAAGTGTT                       |
| Genotyping | rs3851634_C        | GAAGGTGACCAAGTTCATGCTGATGAAGAAGCCTATTCCAGCAG        |
|            | rs3851634_T        | GAAGGTCGGAGTCAACGGATTGGATGAAGAAGCCTATTCCAGCAA       |
|            | rs3851634_Common   | GATGCTTATTCAAGTTCCTTTTGCCAGTT                       |
| Genotyping | rs4432939_T        | GAAGGTGACCAAGTTCATGCTGATGCTAACATCTCATTTCCTTTCCAT    |
|            | rs4432939_C        | GAAGGTCGGAGTCAACGGATTATGCTAACATCTCATTTCCTTTCCAC     |
|            | rs4432939_Common   | CCAAGAGTGACCCTTGAAATGAATTCTA                        |
| Sequencing | rs4432939_Forward  | GGGCAAAGTGGGAGGATAGT                                |
|            | rs4432939_Reverse  | GCCAGTGTCAACGAGCTA                                  |
| Genotyping | rs11196067_T       | GAAGGTGACCAAGTTCATGCTAGGGTCAAAAATCTTCATTGTATACTCT   |
|            | rs11196067_A       | GAAGGTCGGAGTCAACGGATTAGGGTCAAAAATCTTCATTGTATACTCA   |
|            | rs11196067_Common  | AAGTTGGAGCCCTGTATTTTCACAGATAA                       |
| Sequencing | rs11196067_Forward | GTCTGGTTGCTTTGCTGACA                                |
|            | rs11196067_Reverse | GAAGGTAGAGGCTGCATTGC                                |
| Genotyping | rs12230172_A       | GAAGGTGACCAAGTTCATGCTAAGCCGGCCCCAGAGGCAA            |
|            | rs12230172_G       | GAAGGTCGGAGTCAACGGATTGCCGGCCCCAGAGGCAG              |
|            | rs12230172_Common  | GAGCAAGAGCTAGGATTAAGAATTGGAAA                       |
| Sequencing | rs12230172_Forward | TTTGATGACTTGCAATTTCAAT                              |
|            | rs12230172_Reverse | CTGCAAGTTGCTCAGCTCAC                                |
| Genotyping | rs12780046_G       | GAAGGTGACCAAGTTCATGCTTGTGGAAATTGAGCTAAATTGTTGTG     |
|            | rs12780046_T       | GAAGGTCGGAGTCAACGGATTAAGTTGTGGAAATTGAGCTAAATTGTTGTT |
|            | rs12780046_Common  | GGGTATGCGGAAACCTTTGGGTTTA                           |
| Sequencing | rs12780046_Forward | TCTCAGTGTACCTCTTCTGGA                               |
|            | rs12780046_Reverse | AGGGGTATGCGGAAACCTTT                                |
| Genotyping | rs76178334_C       | GAAGGTGACCAAGTTCATGCTAGAGCTATTCCGGCTCTTGC           |
|            | rs76178334_G       | GAAGGTCGGAGTCAACGGATTCTAGAGCTATTCCGGCTCTTGG         |

|            |                                                      |                                                                                                                                             |
|------------|------------------------------------------------------|---------------------------------------------------------------------------------------------------------------------------------------------|
|            | rs76178334_Common                                    | CATGGAGATGACATTGAAAGACTGACTAT                                                                                                               |
| Sequencing | rs76178334_Forward<br>rs76178334_Reverse             | TGGATGACAGCCAGGGAATC<br>TGTATTGGGCTTTGCAAGGG                                                                                                |
| Genotyping | rs78543262_A<br>rs78543262_G<br>rs78543262_Common    | GAAGGTGACCAAGTTCATGCTACTGTGCAACATAACAAGGTCCCA<br>GAAGGTCGGAGTCAACGGATTCTGTGCAACATAACAAGGTCCCG<br>CATGCATCACCATGCCTGGCTAATT                  |
| Sequencing | rs78543262_Forward<br>rs78543262_Reverse             | CCACTTAAATTGGTAAACAGGCC<br>CTGCAATCCTCCACCTCA                                                                                               |
| Genotyping | rs182521816_A<br>rs182521816_G<br>rs182521816_Common | GAAGGTGACCAAGTTCATGCTAGGCATAACCAGATAAAAAAATAGAGTTCA<br>GAAGGTCGGAGTCAACGGATTGGCATAACCAGATAAAAAAATAGAGTTCG<br>AGACTAATGCTTCTATCATGTCTCCATATT |
| Sequencing | rs182521816_Forward<br>rs182521816_Reverse           | TGGGTATGTGTGCTTGTGTAC<br>GCTCTAAGTCAAATGAATGTGGG                                                                                            |
| Sequencing | rs117527984_Forward<br>rs117527984_Reverse           | TCCCTCTAATGAAGCCTGT<br>AGTTAGGACCATGGGCTTGA                                                                                                 |
| Sequencing | rs138170678_Forward<br>rs138170678_Reverse           | TGAACTGTATGCTCCTCAAGG<br>GGAGCTTCTAGACATGTTTCAGG                                                                                            |
| Sequencing | rs141035288_Forward<br>rs141035288_Reverse           | GGTCTGCCCGATTTCAAATT<br>ACGCCATTCTTCTGCCTC                                                                                                  |
| Sequencing | rs145034266_Forward<br>rs145034266_Reverse           | CCTGGCTGATTTTGCATTTT<br>GGATTGCATTCTGGTTTCT                                                                                                 |

**Supplementary Table 10: Genotyping and sequencing primer sequences.**

## Supplementary References

1. Sanson, M. *et al.* Chromosome 7p11.2 (EGFR) variation influences glioma risk. *Hum Mol Genet* 20, 2897-904 (2011).
2. Shete, S. *et al.* Genome-wide association study identifies five susceptibility loci for glioma. *Nat Genet* 41, 899-904 (2009).
3. Wrensch, M. *et al.* Variants in the CDKN2B and RTEL1 regions are associated with high-grade glioma susceptibility. *Nat Genet* 41, 905-8 (2009).
4. Walsh, K.M. *et al.* Variants near TERT and TERC influencing telomere length are associated with high-grade glioma risk. *Nat Genet* 46, 731-5 (2014).
5. Andersson, R. *et al.* An atlas of active enhancers across human cell types and tissues. *Nature* 507, 455-61 (2014).
6. Hnisz, D. *et al.* Super-enhancers in the control of cell identity and disease. *Cell* 155, 934-47 (2013).
7. Enciso-Mora, V. *et al.* Deciphering the 8q24.21 association for glioma. *Hum Mol Genet* 22, 2293-302 (2013).
8. Enciso-Mora, V. *et al.* Low penetrance susceptibility to glioma is caused by the TP53 variant rs78378222. *Br J Cancer* 108, 2178-85 (2013).
